# Supplementary material for: A time-resolved interaction analysis of Bem1 reconstructs the flow of Cdc42 during polar growth
Source: Life Sci Alliance. 2020 Jul 31;3(9):e202000813. doi: 10.26508/lsa.202000813 (PMC7409549; doi:10.26508/lsa.202000813)
Supplement: Supplementary file 3 [file LSA-2020-00813_TableS3.xlsx]

## Sheet: Blatt1
No.	Plasmid	Description	Origin
1	pFA6a natNT2	natNT2, AmpR	Janke et al., 2004
2	pFA6a hphNT1	hphNT1, AmpR	Janke et al., 2004
3	pFA6a kanMX6	kanMX6, AmpR	Bähler et al., 1998
4	pFA6a CmLEU2	CmLEU2, AmpR	Schaub et al., 2006
5	pFA6a HIS3MX6	HISMX6, AmpR	Longtine et al., 1998
6	pRS 314	AmpR, TRP1, CEN	Sikorski and Hieter, 1989
7	pRS 315	AmpR, LEU2, CEN	Sikorski and Hieter, 1989
8	pRS 316	AmpR, URA3, CEN	Sikorski and Hieter, 1989
9	pYM-N35	PMET17, natNT2, AmpR	Janke et al., 2004
10	pPCUP1Nub-HA kanMX4	PCUP1Nub-HA, AmpR, kanMX4	Dünkler et al., 2012
11	pPCUP1Nub-HA kanMX4 CEN	PCUP1Nub-HA, AmpR, kanMX4, CEN6/ARSH4	Dünkler et al., 2012
12	pCRU 303	Cub-R-URA3, AmpR, HIS3	Dünkler et al., 2012
13	pFA6a CRU HIS3MX6	Cub-R-URA3, AmpR, HISMX6	This work
14	pBem1-CRU 303	BEM1-Cub-R-URA3, AmpR, HIS3	This work
15	pPMET Bem1 CRU 313	PMET17BEM1-CUb-R-URA3, AmpR, HIS3	This work
16	pPMET Bem1WK CRU 313	PMET17BEM1W192K-CUb-R-URA3, AmpR, HIS3	This work
17	pBud6-CRU 303	BUD6-Cub-R-URA3, AmpR, HIS3	This work
18	pPMET Bud61-364 CRU 313	PMET17 BUD61-364-Cub-R-URA3, HIS3, CEN	This work
19	pPMET Bud6360-788 CRU 313	PMET17 BUD6360-788-Cub-R-URA3, HIS3, CEN	This work
20	pEpo1-CRU 303	EPO1-Cub-R-URA3, AmpR, HIS3	Neller et al., 2014
21	pNba1-CRU 303	NBA1-Cub-R-URA3, AmpR, HIS3	This work
22	pGps1-CRU 303	GPS1-Cub-R-URA3, AmpR, HIS3	This work
23	pPMET Gps1536-758 CRU 313	PMET17 GPS1536-758 -CUb-R-URA3, AmpR, HIS3	This work
24	pBoi1-CRU 303	BOI1-Cub-R-URA3, AmpR, HIS3	Kustermann et al., 2017
25	pBoi2-CRU 303	BOI2-Cub-R-URA3, AmpR, HIS3	Kustermann et al., 2017
26	pFir1-CRU 303	FIR1-Cub-R-URA3, AmpR, HIS3	This work
27	pBem1-CCG 306	BEM1-mCHERRY-Cub-R-GFP, AmpR, URA3	This work
28	pBoi1-CCG 306	BOI1-mCHERRY-Cub-R-GFP, AmpR, URA3	Kustermann et al., 2017
29	pEpo1-CCG 306	EPO1-mCHERRY-Cub-R-GFP, AmpR, URA3	Neller et al., 2014
30	pGic2PBD-RFP	PGIC2-GIC21-208-RFP, AmpR, HIS3, URA3	Tong et al., 2007
31	pPMETGic2PBD 314	PMET17-GIC21-208-9xMYC, AmpR, TRP1	This work
32	pPMETGic2PBD 315	PMET17-GIC21-208-9xMYC, AmpR, LEU2	This work
33	pGic2PBD-mCherry 306	PGIC2-GIC21-208-mCHERRY, AmpR, Ura3	This work
34	pPMETBem1 316	PBEM1 BEM1, URA3, AmpR, CEN	This work
35	pPMETBem1 313	PMET17 GFP-BEM1, AmpR, HIS3, CEN	This work
36	pPMETBem11-414 313	PMET17 GFP-bem11-414, AmpR, HIS3, CEN	This work
37	pPMETBem1145-551 313	PMET17 GFP-bem1145-551, AmpR, HIS3, CEN	This work
38	pPMETBem1145-414 313	PMET17 GFP-bem1145-414, AmpR, HIS3, CEN	This work
39	pPMETBem1145-268 313	PMET17 GFP-bem1145-268, AmpR, HIS3, CEN	This work
40	pPMETBem1268-551 313	PMET17 GFP-bem1268-551, AmpR, HIS3, CEN	This work
41	pPMETBem1217-414 313	PMET17 GFP-bem1217-414, AmpR, HIS3, CEN	This work
42	pPMETBem1268-414 313	PMET17 GFP-bem1268-414, AmpR, HIS3, CEN	This work
43	pPMETBem1470-551 313	PMET17 GFP-bem1470-551, AmpR, HIS3, CEN	This work
44	pPMETBem1WK 313	PMET17 GFP-bem1W192K, AmpR, HIS3, CEN	This work
45	pPMETBem1ND 313	PMET17 GFP-bem1N253D, AmpR, HIS3, CEN	This work
46	pPMETBem1WK ND 313	PMET17 GFP-bem1W192K N253D, AmpR, HIS3, CEN	This work
47	pPMETBem1145-268 WK 313	PMET17 GFP-bem1145-268 W192K, AmpR, HIS3, CEN	This work
48	pPMETBem1145-268 ND 313	PMET17 GFP-bem1145-268 N253D, AmpR, HIS3, CEN	This work
49	pPMETBem1145-268 WK ND 313	PMET17 GFP-bem1145-268 W192K N253D, AmpR, HIS3, CEN	This work
50	pPMETBem3-GFP 313	PMET17 BEM3-GFP, AmpR, HIS3, CEN	This work
51	pPMETBem3R950G-GFP 313	PMET17 BEM3R950G-GFP, AmpR, HIS3, CEN	This work
52	pPMETBem350-end-GFP 313	PMET17 BEM350-end-GFP, AmpR, HIS3, CEN	This work
53	pPMETBem3101-end-GFP 313	PMET17 BEM3101-end-GFP, AmpR, HIS3, CEN	This work
54	pPMETBem3ΔPX-GFP 313	PMET17 BEM3Δ111-118-GFP, AmpR, HIS3, CEN	This work
55	pPMETBem3GAP-GFP 313	PMET17 BEM3751-end-GFP, AmpR, HIS3, CEN	This work
56	pPMETBem3PHmut-GFP 313	PMET17 BEM3R664S R645S K647D-GFP, AmpR, HIS3, CEN	This work
57	pPMETBem3-GFP 315	PMET17 BEM3-GFP, AmpR, LEU2, CEN	This work
58	pPMETBem3R950G-GFP 315	PMET17 BEM3R950G-GFP, AmpR, LEU2, CEN	This work
59	pBem1 GFP 303	PBEM1 BEM1-GFP, AmpR, HIS3	This work
60	pBem1WK GFP 303	PBEM1 BEM1W192K-GFP, AmpR, HIS3	This work
61	pBoi1∆PxxP 303	PBOI1 BOI1∆394-413, AmpR, HIS3	This work
62	pBoi1∆PxxP-GFP 303	PBOI1 BOI1∆394-413-GFP, AmpR, HIS3	This work
63	pBoi1 303	PBOI1 BOI1, AmpR, HIS3	This work
64	pBoi1-GFP 303	PBOI1 BOI1-GFP, AmpR, HIS3	This work
65	pCla4 303	PCLA4 CLA4, AmpR, HIS3	This work
66	pCla4PPAA FL 303	PCLA4 CLA4F15A PP22.25AA F451L, AmpR, HIS3	This work
67	pCla4PPAA FL-GFP 303	PCLA4 CLA4F15A PP22.25AA F451L-GFP, AmpR, HIS3	This work
68	pCla4 GFP 303	PCLA4 CLA4-GFP, AmpR, HIS3	This work
69	pSte20 303	PSTE20 STE20, AmpR, HIS3	This work
70	pSte20PPAA 303	PSTE20 STE20PP477.480AA, AmpR, HIS3	This work
71	pSte20FLPT 303	PSTE20 STE20F470L P475T, AmpR, HIS3	This work
72	pPMETSte20-CRU 313	PMET17 STE20-CUb-R-URA3, AmpR, HIS3	This work
73	pPMETSte20PPAA-CRU 313	PMET17 STE20PP477.480AA-CUb-R-URA3, AmpR, HIS3	This work
74	pPMETSte20FLPT-CRU 313	PMET17 STE20 F470L P475T-CUb-R-URA3, AmpR, HIS3	This work
75	pBem1-GFP 304	BEM1-GFP, AmpR, TRP1	This work
76	pCdc24-GFP 304	CDC24-GFP, AmpR, TRP1	This work
77	pNba1-GFP 304	NBA1-GFP, AmpR, TRP1	This work
78	pGps1-GFP 304	GPS1-GFP, AmpR, TRP1	This work
79	pBoi1-GFP 304	BOI1-GFP, AmpR, TRP1	Kustermann et al., 2017
80	pPMETSH3Boi1-GFP 306	PMET17 BOI11-83-GFP, AmpR, URA3	This work
81	pBoi2-GFP 304	BOI2-GFP, AmpR, HIS3	Kustermann et al., 2017
82	pPMETSH3Boi2-GFP 306	PMET17 BOI21-110-GFP, AmpR, URA3	This work
83	pCla4-GFP 304	CLA4-GFP, AmpR, TRP1	This work
84	pSte20-GFP 304	STE20-GFP, AmpR, TRP1	This work
85	pShs1-GFP304	SHS1-GFP, AmpR, TRP1	This work
86	pMyo1-mCherry 306	MYO1-mCHERRY, AmpR, URA3	This work
87	pGEX-6PI	PtacGST, AmpR	GE Healthcare
88	pGEX-6PI Bud61-364	PtacGST-BUD61-364, AmpR	This work
89	pGEX-6PI Bem1140-271	PtacGST-BEM1418-813, AmpR	This work
90	pGEX-6PI Nbp2	PtacGST-NBP2, AmpR	This work
91	pGEX-2T	PtacGST, AmpR	GE Healthcare
92	pGEX-2T-SH3Boi1	PtacGST-BOI11-154, AmpR	This work
93	pGEX-2T-SH3Boi2	PtacGST-BOI21-160, AmpR	This work
94	pAc	PT76HIS, KanR	Iffland et al., 2000
95	pAc Epo1PxxP-SNAP	PT7-6his-EPO1640-670-SNAP, KanR	This work
96	pAc Nba1PxxP-SNAP	PT7-6his-NBA1202-289-SNAP, KanR
97	pAc Cla41-33-SNAP	PT7-6his-CLA41-33-SNAP, KanR	This work
98	pAc Cla41-33 AA-SNAP	PT7-6his-CLA41-33 PP22.25AA-SNAP, KanR	This work
99	pAc Cla41-33 F15A AA-SNAP	PT7-6his-CLA41-33 F15A PP22.25AA-SNAP, KanR	This work
100	pAc Cla41-33 F15A-SNAP	PT7-6his-CLA41-33 F15A-SNAP, KanR	This work
101	pAc Cla4437-471-SNAP	PT7-6his-CLA4437-471-SNAP, KanR	This work
102	pAc Cla4437-471 F451L-SNAP	PT7-6his-CLA4437-471 F451L-SNAP, KanR	This work
103	pPMETCla41-471-9xMyc 314	PMET17 CLA41-471 9xMYC, AmpR, TRP1	This work
104	pPMETCla41-471 F15A AA/AA-9xMyc 314	PMET17 CLA41-471 F15A PP22.25AA PP458.461AA 9xMYC, AmpR, TRP1	This work
105	pPMETCla41-471 F15A AA/PP F451L-9xMyc 314	PMET17 CLA41-471 F15A PP22.25AA F451L 9xMYC, AmpR, TRP1	This work
106	pPMETSte20-9xMyc 314	PMET17 STE20-9xMYC, AmpR, TRP1	This work
107	pPMETSte20F470l P475T-9xMyc 314	PMET17 STE20 F470l P475T -9xMYC, AmpR, TRP1	This work
108	pPMETSte20PP477.480AA-9xMyc 314	PMET17 STE20 PP477.480AA-9xMYC, AmpR, TRP1	This work
109	pML107	PTDH3SpCAS9, AmpR, LEU2	Laughery et al., 2015
110	pML107 Bem1-748	PSNR52sgRNA-BEM1748, PTDH3SpCAS9, AmpR, LEU2	This work
111	pML107 Bem1-561	PSNR52sgRNA-BEM1561, PTDH3SpCAS9, AmpR, LEU2	This work
112	pML107 Fir1-1573	PSNR52sgRNA-FIR11573, PTDH3SpCAS9, AmpR, LEU2	This work
113	pML107 Boi1-792	PSNR52sgRNA-BOI1792, PTDH3SpCAS9, AmpR, LEU2	This work
114	pML107 Boi2-906	PSNR52sgRNA-BOI2906, PTDH3SpCAS9, AmpR, LEU2	This work
