# Supplementary material for: A time-resolved interaction analysis of Bem1 reconstructs the flow of Cdc42 during polar growth
Source: Life Sci Alliance. 2020 Jul 31;3(9):e202000813. doi: 10.26508/lsa.202000813 (PMC7409549; doi:10.26508/lsa.202000813)
Supplement: Supplementary file 4 [file LSA-2020-00813_TableS4.xlsx]

## Sheet: Blatt1
Strain	Name	Relevant genotype	Origin
JD47	JD47	MATa, his3-Δ200, leu2-3, 112 lys2-801, trp1-Δ63, ura3-52	Dohmen et al., 1995
JD53	JD53	MATα, his3-Δ200, leu2-3, 112 lys2-801, trp1-Δ63, ura3-52	Dohmen et al., 1995
JD51	JD51	MATa/α, his3-Δ200/his3-Δ200, leu2-3/leu2-3, 112 lys2- 801/112 lys2-801, trp1-Δ63/trp1-Δ63, ura3-52/ura3-52	Dohmen et al., 1995
ULM53	ULM53	MATα, his3-Δ200, leu2-3, 112 lys2-801, trp1-Δ63, ura3-52	This work
NJY319	Bem1CRU	JD47, BEM1::BEM1-Cub-R-URA3 HIS3	This work
YAD3026	Bem1WK	JD47, BEM1::bem1W192K	This work
STY1133	Bem1WKCRU	JD47, BEM1::bem1W192K-Cub-R-URA3 HIS3	This work
ARY41	Bem1ΔPBCRU	JD47, BEM1::bem11-479-Cub-R-URA3 HIS3	This work
STY1118	Bem1CRU	1n; BEM1::BEM1-Cub-R-URA3 LEU2, PNBA1::PCUP1Nub-HA kanMX, BOI2::hphNT1,	This work
	Nub-Nba1 Δboi2
STY1119	Bem1CRU	1n; BEM1::BEM1-Cub-R-URA3 LEU2, PNBA1::PCUP1Nub-HA kanMX, BOI1::natNT2, BOI2::hphNT1, PBOI1::PBOI1boi1Δ394-413 HIS3	This work
	Nub-Nba1
	Δboi2 Boi1ΔPxxP
STY1129	Bem1CRU	1n; pPMET17 BEM1-Cub-R-URA3 CEN TRP1, PBem1::PCUP1Nub-HA kanMX, BOI2::hphNT1,	This work
	Nub-Bem1 Δboi2
STY1130	Bem1CRU	1n; pPMET17 BEM1-Cub-R-URA3 CEN TRP1, PBUD6::PCUP1Nub-HA kanMX, BOI1::natNT2, BOI2::hphNT1, PBOI1::PBOI1boi1Δ394-413 HIS3	This work
	Nub-Bem1
	Δboi2 Boi1ΔPxxP
STY1151	Bem1CRU	JD47, BEM1::BEM1-Cub-R-URA3 LEU2, PBUD6::PCUP1Nub-HA kanMX,	This work
	Nub-Bud6
STY1149	Bem1CRU	1n; BEM1::BEM1-Cub-R-URA3 LEU2, PBUD6::PCUP1Nub-HA kanMX, BOI2::hphNT1,	This work
	Nub-Bud6 Δboi2
STY1150	Bem1CRU	1n; BEM1::BEM1-Cub-R-URA3 LEU2, PBUD6::PCUP1Nub-HA kanMX, BOI1::natNT2, BOI2::hphNT1, PBOI1::PBOI1boi1Δ394-413 HIS3	This work
	Nub-Bud6
	Δboi2 Boi1ΔPxxP
NJY355	Bud6CRU	JD47, BUD6::BUD6-Cub-R-URA3 HIS3	This work
YWY45	Bud61-364CRU	JD47, pPMET17 BUD61-364-Cub-R-URA3 CEN HIS3	This work
YWY45	Bud6360-788CRU	JD47, pPMET17 BUD6360-788-Cub-R-URA3 CEN HIS3	This work
UNY94	Gps1CRU	JD47, GPS1::GPS1-Cub-R-URA3 HIS3	This work
YWY57	Gps1536-758CRU	JD47, pPMET17GPS1536-758-CUb-R-URA3 CEN HIS3	This work
STY484	Gps1536-758CRU	JD53, pPMET17GPS1536-758-CUb-R-URA3 CEN HIS3, PBOI1::PCUP1Nub-HA kanMX	This work
	Nub-Boi1
STY485	Gps1536-758CRU Nub-Boi1 Δnba1	JD53, pPMET17GPS1536-758-CUb-R-URA3 CEN HIS3, PBOI1::PCUP1Nub-HA kanMX, NBA1::natNT2	This work
STY487	Gps1536-758CRU Nub-Guk1	JD47, pPMET17GPS1536-758-CUb-R-URA3 CEN HIS3, pPCUP1Nub-HA-GUK1 CEN kanMX	This work
STY487	Gps1536-758CRU	JD47, pPMET17GPS1536-758-CUb-R-URA3 CEN HIS3, pPCUP1Nub-HA-GUK1 CEN kanMX, NBA1::natNT2	This work
	Nub-Guk1 Δnba1
YWY63	Nba1CRU	JD47, NBA1::NBA1-Cub-R-URA3 HIS3	This work
NJY317	Boi1CRU	JD47, BOI1::BOI1-Cub-R-URA3 HIS3	Kustermann et al., 2017
NJY318	Boi2CRU	JD47, BOI2::BOI2-Cub-R-URA3 HIS3	Kustermann et al., 2017
STY1307	Fir1CRU	JD47, PFIR1::PMET17 natNT2,	This work
		FIR1::FIR1-Cub-R-URA3 HIS3
YAD3556	Fir1ΔPxxPCRU	JD47, PFIR1:: PMET17 natNT2,	This work
		FIR1::fir1PKRSPLR/AKSSLS-Cub-R-URA3 HIS3
STY48	Epo1CRU	JD47, PFIR1:: PMET17 natNT2,	Neller et al., 2014
		EPO1::EPO1-Cub-R-URA3 HIS3
YAD2288	Epo1ΔPxxPCRU	JD47, PFIR1:: PMET17 natNT2,	This work
		EPO1::epo1Δ654-661-Cub-R-URA3 HIS3
NJY168	Cla4CRU	JD47, CLA4::CLA4-Cub-R-URA3 HIS3	This work
NJY169	Ste20CRU	JD47, STE20::STE20-Cub-R-URA3 HIS3	This work
YAD1072	PMETBem1-CCG	JD47, PBEM1:: PMET17 natNT2,	This work
		BEM1::BEM1-Cherry-Cub-R-GFP URA3
#73	PMETBoi1-CCG	JD47, PBOI1:: PMET17 natNT2,	Kustermann et al., 2017
		BOI1::BOI1-Cherry-Cub-R-GFP URA3
YAD974	PMETEpo1-CCG	JD47, PEPO1:: PMET17 natNT2,	Neller et al., 2014
		EPO1::EPO1-Cherry-Cub-R-GFP URA3
SGY218	Δbem1	pPBEM1-BEM1 CEN URA3	This work
	pBem1 316 , pRS315
SGY190	Δbem1 Δbem2	JD47, bem1::natNT2, bem2::CmLEU2,	This work
	pBem1 316	pPBEM1-BEM1 CEN URA3
SGY211	Δbem1 Δbem3	JD47, bem1::natNT2, bem3::CmLEU2, pPBEM1-BEM1 CEN URA3	This work
	pBem1 316
SGY217	Δbem1 Δbem3 pBem1 316	JD47, bem1::natNT2, bem3::CmLEU2, pPBEM1-BEM1 CEN URA3,	This work
	pRS314	pRS314 CEN TRP1
SGY216	Δbem1 Δbem3	JD47, bem1::natNT2, bem3::CmLEU2, pPBEM1-BEM1 CEN URA3, pPMET17-GIC21-208-9xMYC CEN LEU2	This work
	pBem1 316 ,
	pPMETGic2PBD
SGY222	Δbem1 Δbem3	JD47, bem1::natNT2, bem3::CmLEU2, pPBEM1-BEM1 316 CEN URA3, pRS313	This work
	pBem1 316
	pRS313
SGY223	Δbem1 Δbem3	JD47, bem1::natNT2, bem3::CmLEU2,	This work
	pBem1 316	pPMET17GFP-BEM3 CEN HIS3, pPBEM1-BEM1 316 CEN URA3,
	pPMET17-Bem3
SGY65	Δbem1 pBem1 316 pRS313	JD47, bem1::natNT2, pPBEM1-BEM1 CEN URA3, pRS313 HIS3	This work
SGY66	Δbem1 pBem1 316 pPMETBem1	JD47, bem1::natNT2, pPBEM1-BEM1 CEN URA3, pPMET17-GFP-BEM1 CEN HIS3	This work
SGY70	Δbem1 pBem1 316 pPMETBem1145-268	JD47, bem1::natNT2, pPBEM1-BEM1 CEN URA3, pPMET17- GFP-bem1145-268 CEN HIS3	This work
YAD3026	Bem1WK	JD47, BEM1::bem1W192K	This work
STY1217	Bem1ND	JD47, BEM1::bem1N253A	This work
STY1221	Bem1WK/ND	JD47, BEM1::bem1W192K N253A	This work
YAD3027	Bem1WK	ULM53, BEM1::bem1W192K	This work
STY1218	Bem1ND	ULM53, BEM1::bem1N253A	This work
STY1222	Bem1WK/ND	ULM53, BEM1::bem1W192K N253A	This work
STY1230	Bem1WK pPMETGic2PBD	JD47, BEM1::bem1W192K ,	This work
		pPMET17GIC21-208-9xMYC CEN TRP1
STY1228	Bem1ND pPMETGic2PBD	JD47, BEM1::bem1N253A ,	This work
		pPMET17GIC21-208-9xMYC CEN TRP1
STY1232	Bem1WK/ND pPMETGic2PBD	JD47, BEM1::bem1W192K N253A ,	This work
		pPMET17GIC21-208-9xMYC CEN TRP1
LRY418	∆boi1 ∆boi2 Boi1 pPMETGic2PBD	JD47, BOI1::natNT2, BOI2::hphNT1, PBOI1::PBOI1BOI1 HIS3, pPMET17-GIC21-208-9xMYC CEN LEU2	This work
LRY419	∆boi1 ∆boi2	JD47, BOI1::natNT2, BOI2::hphNT1, PBOI1::PBOI1 BOI1∆394-413 HIS3,	This work
	Boi1∆PxxP pPMETGic2PBD	pPMET17-GIC21-208-9xMYC CEN LEU2
SGY156	Δbem1 Bem1	JD47, BEM1::natNT2 PBEM1::PBEM1BEM1 HIS3, pPMET17-GIC21-208-9xMYC CEN LEU2, SHS1::SHS1-mCherry URA3	This work
	pPMETGic2PBD
	Shs1-mCherry
SGY151	Δbem1 Bem1ND	JD47, BEM1::natNT2, PBEM1::PBEM1BEM1 N253A HIS3, pPMET17-GIC21-208-9xMYC CEN LEU2, SHS1::SHS1-mCherry URA3	This work
	pPMETGic2PBD
	Shs1-mCherry
SGY152	Δbem1 Bem1WK	JD47, BEM1::natNT2, PBEM1::PBEM1BEM1 W192K HIS3, pPMET17-GIC21-208-9xMYC CEN LEU2, SHS1::SHS1-mCherry URA3	This work
	pPMETGic2PBD
	Shs1-mCherry
SGY153	Δste20 Ste20FLPT	JD47, STE20::natNT2, PSTE20::PSTE20STE20 F470L P475T HIS3, pPMET17-GIC21-208-9xMYC CEN LEU2, SHS1::SHS1-mCherry URA3	This work
	pPMETGic2PBD
	Shs1-mCherry
SGY154	Δcla4 Cla4PPAA FL	JD47, CLA4::natNT2, PCLA4::PCLA4CLA4 F15A PP22.25AA F451L HIS3, pPMET17-GIC21-208-9xMYC CEN LEU2, SHS1::SHS1-mCherry URA3	This work
	pPMETGic2PBD
	Shs1-mCherry
SGY371	Δste20 Ste20	JD47, STE20::natNT2, PSTE20::PSTE20STE20, HIS3, pPMET17-GIC21-208-9xMYC CEN LEU2, SHS1::SHS1-mCherry URA3	This work
	pPMETGic2PBD
	Shs1-mCherry
SGY158	Δste20 Δcla4 Cla4PPAA FL	JD47, STE20::hphNT1, CLA4::natNT2, PCLA4::PCLA4CLA4 F15A PP22.25AA F451L HIS3, pPMET17-GIC21-208-9xMYC CEN LEU2, SHS1::SHS1-mCherry URA3	This work
	pPMETGic2PBD
	Shs1-mCherry
SGY366	Δste20 Δcla4	JD47, STE20::hphNT1, CLA4::natNT2, PCLA4::PCLA4CLA4 HIS3, PSTE20::PSTE20STE20 TRP1, pPMET17-GIC21-208-9xMYC CEN LEU2, SHS1::SHS1-mCherry URA3	This work
	Ste20 Cla4
	pPMETGic2PBD
	Shs1-mCherry
SGY369	Δste20 Δcla4	JD47, STE20::hphNT1, CLA4::natNT2, PCLA4::PCLA4CLA4 F15A PP22.25AA F451L HIS3, PSTE20::PSTE20STE20 F470L P475T TRP1, pPMET17-GIC21-208-9xMYC CEN LEU2, SHS1::SHS1-mCherry URA3	This work
	Ste20 FLPT Cla4 PPAA FL
	pPMETGic2PBD
	Shs1-mCherry
SGY368	Δcla4 Cla4	JD47, CLA4::natNT2, PCLA4::PCLA4CLA4 HIS3, pPMET17-GIC21-208-9xMYC CEN LEU2, SHS1::SHS1-mCherry URA3	This work
	pPMETGic2PBD
	Shs1-mCherry
LRY443	∆boi1 ∆boi2 Boi1 Bem1-GFP Shs1-mCherry	JD47, BOI1::natNT2, BOI2::hphNT1, PBOI1::PBOI1 BOI1 HIS3, BEM1::BEM1-GFP TRP1, SHS1::SHS1-mCherry URA3	This work
LRY444	∆boi1 ∆boi2 Boi1∆PxxP Bem1-GFP Shs1-mCherry	JD47, BOI1::natNT2, BOI2::hphNT1, PBOI1::PBOI1 BOI1∆394-413 HIS3, BEM1::BEM1-GFP TRP1, SHS1::SHS1-mCherry URA3	This work
SGY265	∆cyk3 ∆hof1	JD47, CYK3::kanMX, HOF1::natNT2, pPHOF1HOF1 CEN URA3, pRS315	This work
	pHof1 316
SGY271	∆cyk3 ∆hof1 ∆ste20	JD47, CYK3::kanMX, HOF1::natNT2, STE20::HISMX pPHOF1HOF1 CEN URA3, pRS314 TRP1, pRS315 LEU2	This work
	pHof1 316
SGY273	∆cyk3 ∆hof1 Ste20FLPT pHof1 316	JD47, CYK3::kanMX, HOF1::natNT2 pPHOF1HOF1 CEN URA3, STE20::HISMX PSTE20::PSTE20STE20 TRP1, pRS315 LEU2	This work
SGY51	pPMETGFP-Bem1145-268	JD47, pPMET17GFP-bem1145-268 CEN HIS3	This work
SGY27	pPMETGFP-Bem1145-268 ND	JD47, pPMET17GFP-bem1145-268 ND CEN HIS3	This work
SGY63	pPMETGFP-Bem1145-268 WK	JD47, pPMET17GFP-bem1145-268 WK CEN HIS3	This work
YAD860	Bem1-GFP	JD47, BEM1::BEM1-GFP TRP1	This work
STY560	Bem1-GFP	JD47, BEM1::BEM1-GFP TRP1, GPS1::HISMX	This work
	∆gps1
STY528	Bem1-GFP	JD47, BEM1::BEM1-GFP TRP1, NBA1::nba1PPR280,282AAA	This work
	Nba1∆PxxP
YAD3474	Bem1-GFP	JD47, BEM1::BEM1-GFP TRP1, FIR1::fir1PKRSPLR 525,531 AKSSALS	This work
	Fir1∆PxxP
YAD3476	Bem1-GFP	JD47, BEM1::BEM1-GFP TRP1, NBA1::nba1PPR280,282AAA,	This work
	Nba1∆PxxP Fir1∆PxxP	FIR1::fir1PKRSPLR 525,531 AKSSALS
UNY318	Bem1-GFP	JD47, BEM1::BEM1-GFP TRP1,	This work
	Boi1WK Boi2WK	BOI1::boi1W53K, BOI2::boi2W83K
ARY60	Cdc24-GFP	JD47, CDC24::CDC24-GFP TRP1	This work
STY792	Cdc24-GFP	JD47, CDC24::CDC24-GFP TRP1	This work
	∆gps1	GPS1::HISMX
STY833	Cdc24-GFP	JD47, CDC24::CDC24-GFP TRP1, NBA1::nba1PPR280,282AAA,	This work
	Nba1∆PxxP
YAD3473	Cdc24-GFP	JD47, CDC24::CDC24-GFP TRP1, FIR1::fir1PKRSPLR 525,531 AKSSALS	This work
	Fir1∆PxxP
YAD3475	Cdc24-GFP	JD47, CDC24::CDC24-GFP TRP1, NBA1::nba1PPR280,282AAA,	This work
	Nba1∆PxxP Fir1∆PxxP	FIR1::fir1PKRSPLR 525,531 AKSSALS
UNY317	Cdc24-GFP	JD47, CDC24::CDC24-GFP TRP1,	This work
	Boi1WK Boi2WK	BOI1::boi1W53K, BOI2::boi2W83K
STY1134	Cdc24-GFP	JD47, CDC24::CDC24-GFP TRP1, BEM1::bem1W192K	This work
	Bem1WK
STY578	Boi1-GFP	JD47, BOI1::BOI1-GFP TRP1	This work
STY563	Boi1-GFP	JD47, BOI1::BOI1-GFP TRP1, GPS1::HISMX	This work
	∆gps1
STY834	Boi1-GFP	JD47, BOI1::BOI1-GFP TRP1, NBA1::nba1PPR280,282AAA,	This work
	Nba1∆PxxP
YAD3467	Boi1-GFP	JD47, BOI1::BOI1-GFP TRP1,	This work
	Fir1∆PxxP	FIR1::fir1PKRSPLR 525,531 AKSSALS
YAD3471	Boi1-GFP	JD47, BOI1::BOI1-GFP TRP1, NBA1::nba1PPR280,282AAA,	This work
	Nba1∆PxxP Fir1∆PxxP	FIR1::fir1PKRSPLR 525,531 AKSSALS
STY804	PMETSH3Boi1-GFP	JD47, ura3-52::URA3 PMET17boi11-83-GFP	This work
STY836	PMETSH3Boi1-GFP	JD47, ura3-52::URA3 PMET17boi11-83-GFP, NBA1::nba1PPR280,282AAA	This work
	Nba1∆PxxP
YAD3466	PMETSH3Boi1-GFP	JD47, ura3-52::URA3 PMET17boi11-83-GFP, FIR1::fir1PKRSPLR 525,531 AKSSALS	This work
	Fir1∆PxxP
YAD3472	PMETSH3Boi1-GFP	JD47, ura3-52::URA3 PMET17boi11-83-GFP, NBA1::nba1PPR280,282AAA, FIR1::fir1PKRSPLR 525,531 AKSSALS	This work
	Nba1∆PxxP Fir1∆PxxP
YAD3228	PMETSH3Boi1-GFP	JD47, ura3-52::URA3 PMET17boi11-83-GFP,	This work
	Boi1WK Boi2WK	BOI1::boi1W53K, BOI2::boi2W83K
YWY83	Boi2-GFP	JD47, BOI2::BOI2-GFP TRP1	This work
STY1110	Boi2-GFP	JD47, BOI2::BOI2-GFP TRP1, GPS1::HISMX	This work
	∆gps1
STY835	Boi2-GFP	JD47, BOI2::BOI2-GFP TRP1, NBA1::nba1PPR280,282AAA	This work
	Nba1∆PxxP
YAD3032	PMETSH3Boi2-GFP	JD47, ura3-52::URA3 PMET17boi21-160-GFP	This work
STY1109	PMETSH3Boi2-GFP	JD47, ura3-52::URA3 PMET17boi21-160-GFP,	This work
	∆gps1	GPS1::HISMX
YAD3033	PMETSH3Boi2-GFP	JD47, ura3-52::URA3 PMET17boi21-160-GFP,	This work
	Nba1∆PxxP	NBA1::nba1PPR280,282AAA,
STY576	Nba1-GFP	JD47, NBA1::NBA1-GFP URA3,	This work
STY577	Nba1-GFP	JD47, NBA1::NBA1-GFP URA3,	This work
	∆gps1	GPS1::HISMX
SGY144	Ste20-GFP	JD47, STE20::STE20-GFP TRP1	This work
SGY198	Ste20-GFP	JD47, STE20::STE20-GFP TRP1	This work
	Bem1WK	BEM1::natNT2 PBEM1::PBEM1BEM1W192K HIS3
SGY143	Cla4-GFP	JD47, CLA4::CLA4-GFP TRP1	This work
SGY197	Cla4-GFP	JD47, CLA4::CLA4-GFP TRP1	This work
	Bem1WK	BEM1::natNT2 PBEM1::PBEM1bem1W192K HIS3
SGY199	Boi1-GFP Bem1WK	JD47, BOI1::BOI1-GFP TRP1	This work
		BEM1::natNT2 PBEM1::PBEM1bem1W192K HIS3
LRY318	Boi1-GFP	JD47, BOI1::natNT2, BOI2::hphNT1, PBOI1::PBOI1 BOI1-GFP HIS3	This work
	∆boi2
LRY319	Boi1∆PxxP –GFP	JD47, BOI1::natNT2, BOI2::hphNT1, PBOI1::PBOI1 BOI1∆394-413 –GFP HIS3	This work
	∆boi2
LRY72	Cla41-471-9xMyc	JD47, CLA4::natNT2,	This work
		pPMET17-cla41-471-9xMYC CEN TRP1
LRY73	Cla41-471 PPAA -9xMyc	JD47, CLA4::natNT2,	This work
		pPMET17-cla41-471 PP22.25AA-9xMYC CEN TRP1
LRY74	Cla41-471 F15A PP22.25AA PPAA -9xMyc	JD47, CLA4::natNT2, pPMET17-Cla41-471 F15A PP22.25AA PP458.461AA-9xMYC CEN TRP1	This work
LRY75	Cla41-471 F15A PP22.25AA F451L -9xMyc	JD47, CLA4::natNT2, pPMET17-cla41-471 F15A PP22.25AA F451L-9xMYC CEN TRP1	This work
